# Supplementary material for: Comparison of Community-Level and Patient-Level Social Risk Data in a Network of Community Health Centers
Source: PubMed Central journal article supplement (PMC7596576; doi:10.1001/jamanetworkopen.2020.16852), 2020-10-29
Supplement: jamanetwopen-e2016852-s001.pdf [file jamanetwopen-e2016852-s001.pdf]

## Supplemental Online Content

Cottrell EK, Hendricks M, Dambrun K, et al. Comparison of community-level and patient-level social risk data in a network of community health centers. *JAMA Netw Open*. 2020;3(10):e2016852. doi:10.1001/jamanetworkopen.2020.16852

**eTable 1.** Social Risk Measures and Response Options

**eTable 2.** Social Risk Screening Domains and Total Patients Screened by State

This supplemental material has been provided by the authors to give readers additional information about their work.

**eTable 1.** Social Risk Measures and Response Options

| Domain                    | Measure                                                                                                                                                                                                                                                                                                               | Response                                                                                                                                                                                                                                                                                                                                                                                                                    |
|---------------------------|-----------------------------------------------------------------------------------------------------------------------------------------------------------------------------------------------------------------------------------------------------------------------------------------------------------------------|-----------------------------------------------------------------------------------------------------------------------------------------------------------------------------------------------------------------------------------------------------------------------------------------------------------------------------------------------------------------------------------------------------------------------------|
| Housing Insecurity        | <p>In the last month: a) have you slept outside, in a shelter, or in a place not meant for sleeping?; or b) have you had any concerns about the conditions and quality of your housing?</p> <p><i>After May 17, 2018</i><br/>What is your living situation today?</p> <p>Do have any problems with the following?</p> | <p><b>Yes</b>; No; I choose not to answer</p> <p>I have a steady place to live; <b>I have a place to live today, but am worried about losing it in the future; I do not have a steady place to live</b>; I choose not to answer</p> <p><b>Pests; Mold; Lead paint or pipes; Lack of heat; Oven or stove not working; Smoke detectors missing or not working; Water leaks</b>; None of the above; I choose not to answer</p> |
| Food Insecurity           | <p>In the past 12 months, a) I/we worried that my/our food would run out before I/we got money to buy more; or b) the food I/we bought didn't last and I/we did not have the money to buy more.</p>                                                                                                                   | <p><b>Often true; Sometimes true</b>; Never true; I choose not to answer</p>                                                                                                                                                                                                                                                                                                                                                |
| Financial Resource Strain | <p>How hard is it to pay for the basics, such as food, housing, heating, medical care and medications?</p>                                                                                                                                                                                                            | <p>Not at all; <b>Somewhat hard; Very hard</b>; I choose not to answer</p>                                                                                                                                                                                                                                                                                                                                                  |
| Do you want help?         | <p>Would you like assistance with any of the above items?</p>                                                                                                                                                                                                                                                         | <p><b>Yes</b>; No</p>                                                                                                                                                                                                                                                                                                                                                                                                       |

Bolded responses=Social risk factor (patients who select any of the bolded responses would be identified as screening positive for that domain)

**eTable 2.** Social Risk Screening Domains and Total Patients Screened by State

| State of Residence | Social Risk Screening Domain           |                              |                                 | Total Patients Screened<br>N (column %) |
|--------------------|----------------------------------------|------------------------------|---------------------------------|-----------------------------------------|
|                    | Financial Resource Strain<br>N (row %) | Food Insecurity<br>N (row %) | Housing Insecurity<br>N (row %) |                                         |
| California         | 4368 (96)                              | 4513 (99)                    | 4516 (99)                       | 4,549 (12.4)                            |
| Georgia            | 988 (96)                               | 997 (98)                     | 1003 (98)                       | 1,022 (2.8)                             |
| Indiana            | 557 (98)                               | 560 (99)                     | 562 (99)                        | 567 (1.6)                               |
| Massachusetts      | 1197 (6)                               | 8959 (44)                    | 18974 (93)                      | 20,366 (55.7)                           |
| Minnesota          | 729 (99)                               | 736 (99)                     | 739 (100)                       | 739 (2.0)                               |
| Montana            | 14 (82)                                | 17 (100)                     | 17 (100)                        | 17 (0.1)                                |
| North Carolina     | 812 (96)                               | 825 (97)                     | 832 (98)                        | 847 (2.3)                               |
| New Mexico         | 2 (100)                                | 1 (50)                       | 2 (100)                         | 2 (.01)                                 |
| Ohio               | 308 (93)                               | 313 (94)                     | 321 (97)                        | 332 (0.9)                               |
| Oregon             | 4247 (63)                              | 6220 (92)                    | 4230 (63)                       | 6,753 (18.5)                            |
| Texas              | 38 (95)                                | 40 (100)                     | 40 (100)                        | 40 (0.1)                                |
| Washington         | 1004 (93)                              | 991 (92)                     | 1068 (99)                       | 1,076 (2.9)                             |
| Wisconsin          | 12 (5)                                 | 255 (95)                     | 34 (13)                         | 268 (0.7)                               |
| Total              | 14,276                                 | 24,427                       | 32,338                          | 36,578                                  |
